# Supplementary material for: Sex Moderates the Effect of Aerobic Exercise on Some Aspects of Cognition in Cognitively Intact Younger and Middle-Age Adults
Source: MDPI journal article supplement (doi:10.3390/jcm8060886), 2019-06-21
Supplement: s1 [file s1]

## List of stretching exercises

|                              |                                           |
|------------------------------|-------------------------------------------|
| Abdominal Stretch            | Overhead Triceps Stretch                  |
| Back Stretches               | Pyramid Stretch                           |
| Butterfly Stretch            | Quad Stretch                              |
| Chest Stretch                | Reaching Side Bend                        |
| Chest Stretch against Wall   | Reverse Hurdler's Stretch                 |
| Cross-Legged Stretch         | Runner's Lunge                            |
| Double Calf Stretch on Step  | Seated Glute Stretch with Twist           |
| Figure 4 Stretch             | Seated Glute Stretch with Twist Variation |
| Fire Log Stretch             | Seated Hamstring Stretch                  |
| Hamstring Stretch            | Shoulder Stretch                          |
| Happy Baby                   | Side Squat                                |
| High Lunge Stretch           | Single Calf Stretch on Step               |
| Iliotibial (IT) Band Stretch | Single Knee to Chest                      |
| Kneeling Back Stretches      | Squat Stretch                             |
| Kneeling Chest Stretch       | Squat Stretch Variation                   |
| Kneeling Full Body Stretch   | Standing Full Body Stretch                |
| Kneeling Lateral Stretch     | Standing Hamstring and Calf Stretch       |
| Kneeling Twist               | Standing Hamstring Stretch                |
| Knees to Chest               | Standing Hamstring with IT Stretch        |
| Low Lunge Stretch            | Standing IT Stretch with Overhead Reach   |
| Lying Double Leg Twist       | Standing Quad Stretch                     |
| Lying Twist                  | Upper Body Stretch                        |
| Modified Abdominal Stretch   | Wall Calf Stretch                         |
| Neck Stretch with Rotation   | Wall Calf Stretch Variation               |
| Neck Stretches               | Wrist Stretches                           |
