# Supplementary figures and images for: Sex Moderates the Effect of Aerobic Exercise on Some Aspects of Cognition in Cognitively Intact Younger and Middle-Age Adults
Source: MDPI journal article supplement (doi:10.3390/jcm8060886), 2019-06-21

# CONSORT Diagram

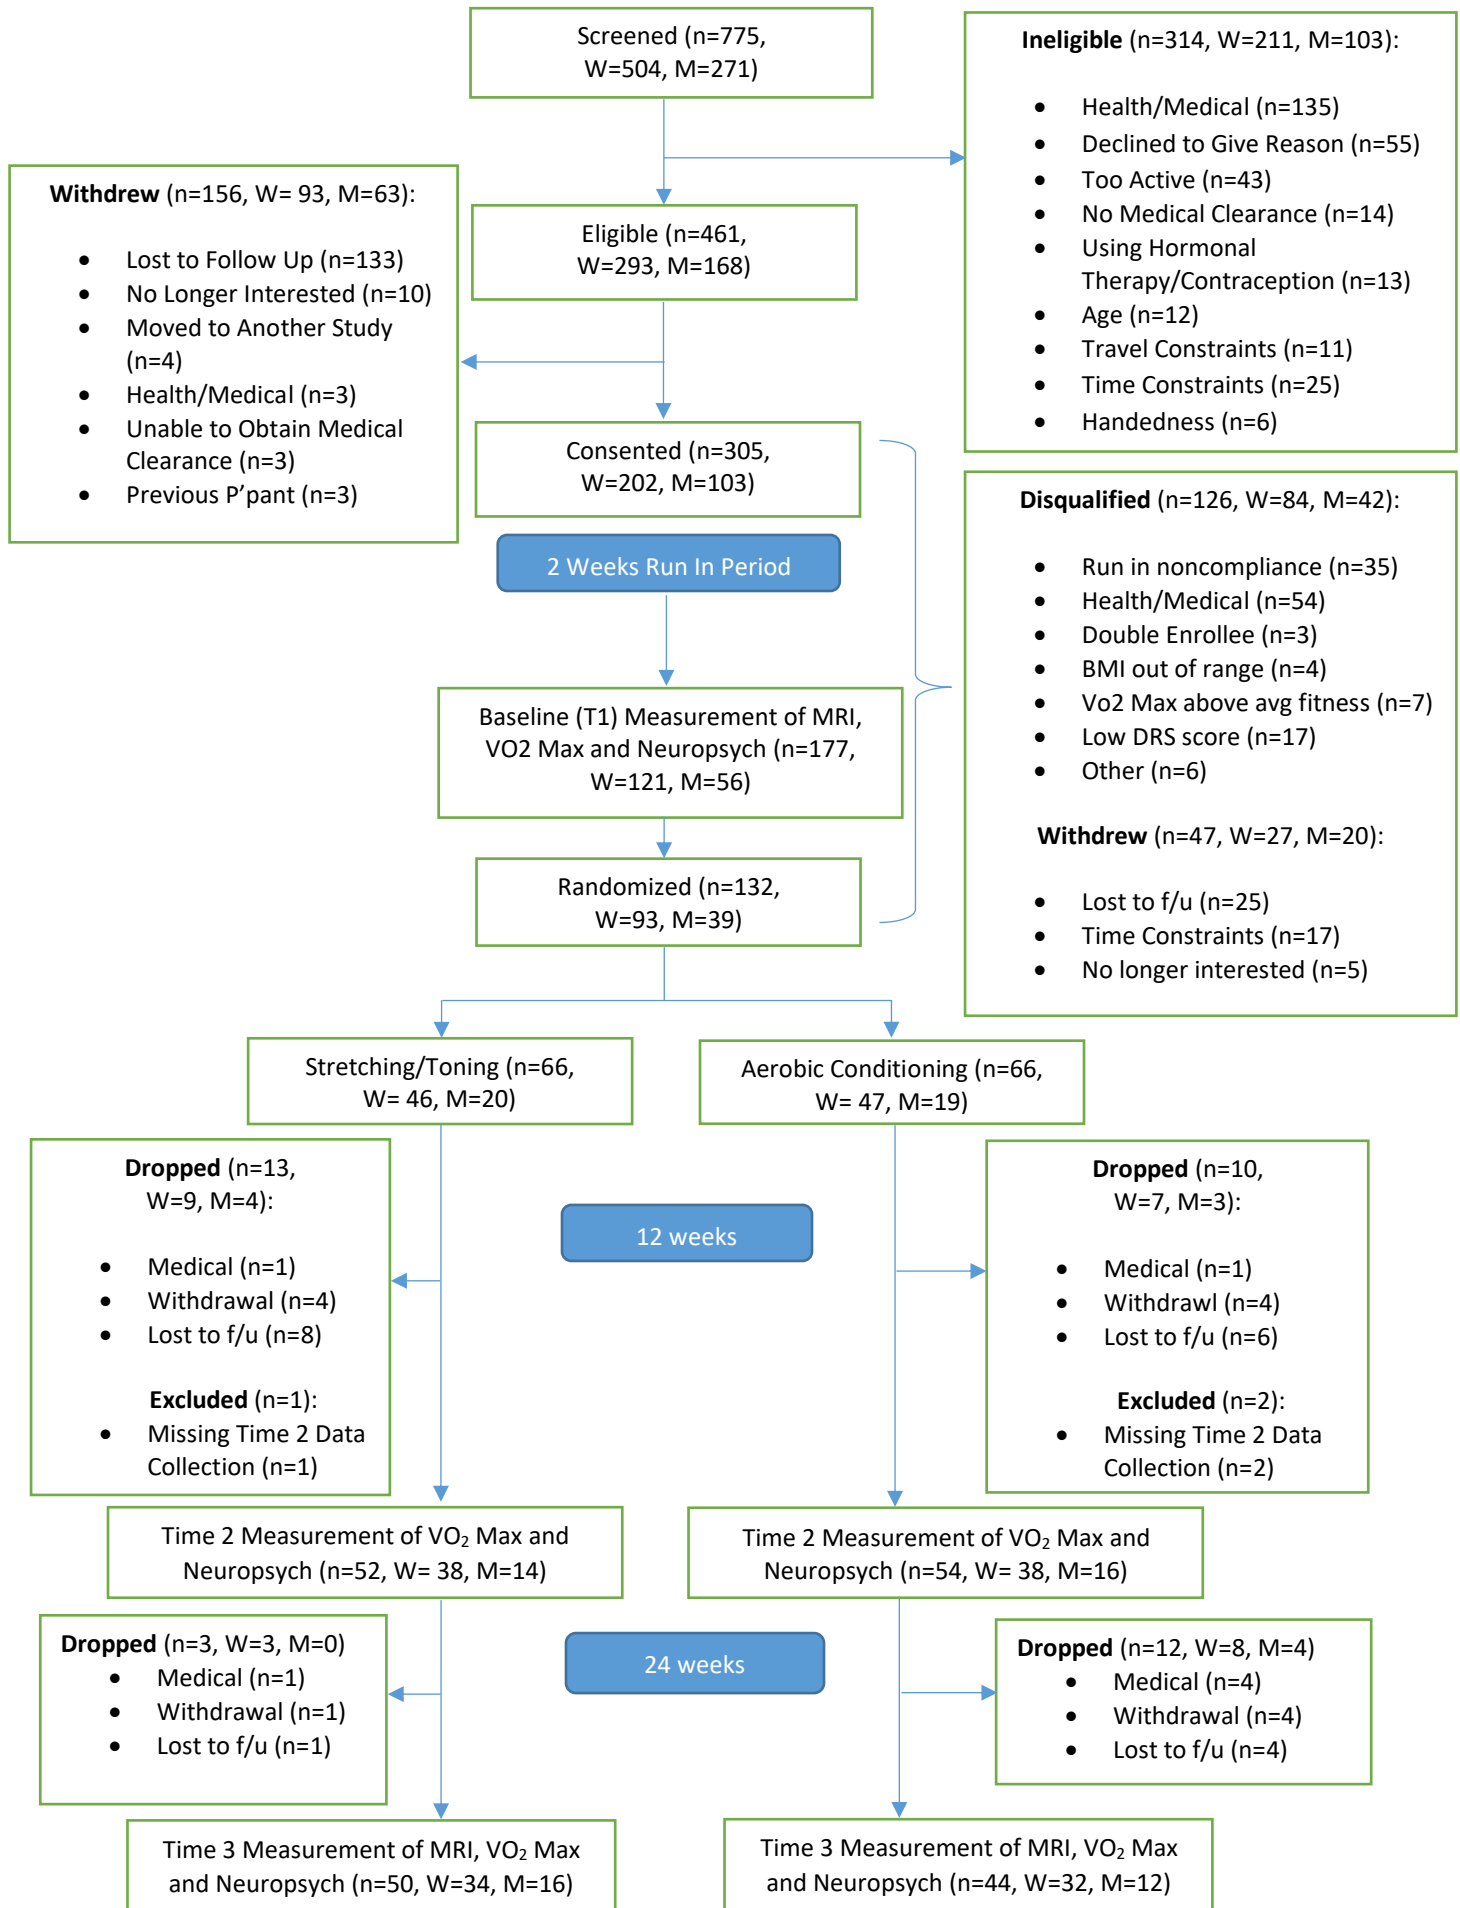

Supplement: s1 [file s1]
